# Supplementary material
Source: PubMed Central journal article supplement (PMC6344958)
Supplement: Supplementary_material_Table_S1.pdf [file Supplementary_material_Table_S1.pdf]

**Table S1: Primer sequences**

| Gene    | Forward                                                 | Reverse                                                  |
|---------|---------------------------------------------------------|----------------------------------------------------------|
| Prkar2b | F: 5'-GCTATTTAGGTGACACTATAG<br>TGTCAAAGAAGGGGAACAC-3'   | R: 5'-TTGTAATACGACTCACTATA<br>GGGTTCCACAGCTCCGTTCTC-3'   |
| Nap1lc  | F: 5'-GCTATTTAGGTGACACTATAG<br>GCCTGGAATTCCCTTGTCAAA-3' | R: 5'-TTGTAATACGACTCACTATA<br>GGGATCACAGCTGCAGGACCTCT-3' |
| Col3a1  | F: 5'-GCTATTTAGGTGACACTATAG<br>AATGGCTCACCAGGACAAAG-3'  | R: 5'-TTGTAATACGACTCACTATA<br>GGGGGCCAGGTTCTCCAGCTA-3'   |
| Bmpr1b  | F: 5'-GCTATTTAGGTGACACTATAG<br>TAGACGCAAAGTCCATGCTG-3'  | R: 5'-TTGTAATACGACTCACTATA<br>GGGCTCCTTGCAATCTCCCAG-3'   |
| Col1a1  | F: 5'-GCTATTTAGGTGACACTATAG<br>ACTGGTACATCAGCCCGAAC-3'  | R: 5'-TTGTAATACGACTCACTATAG<br>GGGGTGGAGGGAGTTTACAC-3'   |
| Cyb5    | F: 5'-GCTATTTAGGTGACACTATAG<br>CACTCTACGGATGCACGAGA-3'  | R: 5'-TTGTAATACGACTCACTATA<br>GGGCACAGGAGGAAAGGGAAA-3'   |
| Cyp1b1  | F: 5'-GCTATTTAGGTGACACTATAG<br>CAGCAACTTCGTTCTGGACA-3'  | R: 5'-TTGTAATACGACTCACTATA<br>GGGACAGGCCAAAAAGCTGGAG-3'  |
| Cyp17a1 | F: 5'-GCTATTTAGGTGACACTATAG<br>GTCACGGTGGGAGACATCTT-3'  | R: 5'-TTGTAATACGACTCACTATA<br>GGGCATAAACCGATCTGGCTG-3'   |
| Foxl2   | F: 5'-GCTATTTAGGTGACACTATAG<br>TCATAGCCAAGTTCCCGTTC-3'  | R: 5'-TTGTAATACGACTCACTATA<br>GGGCCAGGAGTTGTTGAGGAA-3'   |
| Hbb-b1  | F: 5'-GCTATTTAGGTGACACTATAG<br>GCACCTGACTGATGCTGAGA-3'  | R: 5'-TTGTAATACGACTCACATAG<br>GGACGATCATATTGCCAGG-3'     |
| Hsd3b1  | F: 5'-GCTATTTAGGTGACACTATAG<br>ACTCCAAATCTGTGGCTGCT-3'  | R: 5'-TTGTAATACGACTCACTATA<br>GGGGCTCAGGGCTTGCTCATAAC-3' |
| Inha    | F: 5'-GCTATTTAGGTGACACTATAG<br>CTCCCAGGCTATCCTTTTCC-3'  | R: 5'-TTGTAATACGACTCACTATA<br>GGGCCTAGTGTGGGCTACCAG-3'   |
| Inhba   | F: 5'-GCTATTTAGGTGACACTATAG<br>ATGATGACCTTTGCCGAGTC-3'  | R: 5'-TTGTAATACGACTCACTATA<br>GGGCTTCTTCCCATCTCCATCCA-3' |
| Srfp2   | F: 5'-GCTATTTAGGTGACACTATAG<br>CACGAGACCATGAAGGAGGT-3'  | R: 5'-TTGTAATACGACTCACTATA<br>GGGACGCCGTTTCAGCTTGTA-3'   |
| Lhcgr   | F: 5'-GCTATTTAGGTGACACTATAG<br>CGCTTTCCAAGGGATGAATA-3'  | R: 5'-TTGTAATACGACTCACTATA<br>GGGAATCGTAATCCCAGCCAC-3'   |
| Esr2    | F: 5'-GCTATTTAGGTGACACTATAG<br>GGGTGAAGGAGCTACTGCTG-3'  | R: 5'-TTGTAATACGACTCACTATA<br>GGGAACGAGGTCTGGAGCAA-3'    |
| Hsd17b1 | F: 5'-GCTATTTAGGTGACACTATAG<br>ACTCCAAATCTGTGGCTGCT-3'  | R: 5'-TTGTAATACGACTCACTATAG<br>GGGCTCAGGGCTTGCTCATA-3'   |
| Gata4   | F: 5'-GCTATTTAGGTGACACTATAG<br>CTGTGCCAACTGCCAGACTA-3'  | R: 5'-TTGTAATACGACTCACTATAG<br>GGCTGCTGTGCCCATAGTGA-3'   |
| Akr1c1  | F: 5'-GCTATTTAGGTGACACTATAG<br>GTTGCCAAAAGCCACCAAAT-3'  | R: 5'-TTGTAATACGACTCACTATA<br>GGGCCTCCGGTTAAAGTTGGA-3'   |
| Esr1    | F: 5'-GCTATTTAGGTGACACTATAG<br>TACGAAGTGGGCATGATGAA-3'  | R: 5'-TTGTAATACGACTCACTATA<br>GGGGTGAAGGAGCTACTGCTG-3'   |
| Cyp19a1 | F: 5'-GCTATTTAGGTGACACTATAG<br>CGGATAAGTAATGCCCCAGA-3'  | R: 5'-TTGTAATACGACTCACTATA<br>GGGGCACAGGCTCGAGTACTT-3'   |
| Akap12  | F: 5'-GCTATTTAGGTGACACTATA<br>GGCGAGAGTAGGAAAGCCACT-3'  | R: 5'-TTGTAATACGACTCACTATA<br>GGGAAGCCGACGTCATTAGCT-3'   |
| Dcn     | F: 5'-GCTATTTAGGTGACACTATA<br>GAAGAAGGGCCTTCAAGAAC-3'   | R: 5'-TTGTAATACGACTCACTATA<br>GGGCATAACGGTGATGCTGT-3'    |

|                |                                                       |                                                         |
|----------------|-------------------------------------------------------|---------------------------------------------------------|
| Dlk1           | F: 5'-GCTATTTAGGTGACACTATA<br>GCGGGAAATTCTGCGAAATAG-3 | R: 5'-TTGTAATACGACTCACTATA<br>GGGCTTGCACAGACACTCGAAGC-3 |
| Cyp7b1         | F: 5'-GCTATTTAGGTGACACTATAG<br>CCAGCTATGTTCTGGGCAAT-3 | R: 5'-TTGTAATACGACTCACTATAG<br>GGTCCCTCCTTTGAAAAACG-3   |
| Hoxa5          | F: 5'-GCTATTTAGGTGACACTATAG<br>AAAAACTCCCTGGGCAACTC-3 | R: 5'-TTGTAATACGACTCACTATAG<br>GGGGATGAGCTATTTTCGAT-3   |
| Cyp11a1        | F: 5'-GCTATTTAGGTGACACTATAG<br>GCTGGAAGGTGTAGCTCAGG-3 | R: 5'-TTGTAATACGACTCACTATAG<br>GGTTCTTGAAGGGCAGCTTG-3   |
| Grb10          | F: 5'-GCTATTTAGGTGACACTATAG<br>AAACAAAGCGAAGACCGAGA-3 | R: 5'-TTGTAATACGACTCACTATAG<br>GGCACGAGACCTTGTTGCTT-3   |
| OSAP           | F: 5'-GCTATTTAGGTGACACTATAG<br>GGGAAGCCTCGGTTATCTTC-3 | R: 5'-TTGTAATACGACTCACTATAG<br>GGAAGGACCTTTTCCAGGATGG-3 |
| Cited2         | F: 5'-ACTGCCATCTCGCTTCATTT-3                          | R: 5'-CACTGACGACATTCCACAC-3                             |
| Fst            | F: 5'-AGAGGTCGCTGCTCTCTCTG-3                          | R: 5'-CCTCTTCTCCGTTTCTTGC-3                             |
| Gjal           | F: 5'-AACCTTGACTTCCGAGCAGA-3                          | R: 5'-CTTGGGGAACAAAGGAATCA-3                            |
| Ppar-y         | F: 5'-AATGCGAGTGGTCTTCCATC-3                          | R: 5'-CTGTGAGACCAACAGCCTGA-3                            |
| Smarca1        | F: 5'-TCCTTTTCCAGGAGCTCAAA-3                          | R: 5'-AGCTGGGTACAGTGGAATGG-3                            |
| Gata2          | F: 5'-TGCATGCAAGAGAAGTCACC-3                          | R: 5'-ACCACCCTTGATGTCCATGT-3                            |
| Gli3           | F: 5'-TGCCCATCAGCTACTCAGTG-3                          | R: 5'-TTGTTGCAGAGTGAGGTTGC-3                            |
| Igf2           | F: 5'-GAGTTCAGAGAGGCCAAACG-3                          | R: 5'-CCTGCTCAAGAGGAGGTCAC-3                            |
| Mest           | F: 5'-TGGGCTTCATCAACTCCTC-3                           | R: 5'-GAGTTCAGCTGCCTGATC-3                              |
| Sox9           | F: 5'-AGCTACCAGACCCTGAGAA-3                           | R: 5'-TCCCAGCAATCGTTACCTTC-3                            |
| $\beta$ -actin | F: 5'-TGTTACCAACTGGGACGACA-3                          | R: 5'-CCATCACAATGCCTGTGGTA-3                            |
