# Supplementary material
Source: PubMed Central journal article supplement (PMC6344958)
Supplement: Supplementary_Material_TableS2.pdf [file Supplementary_Material_TableS2.pdf]

**Table S2.**  
**Immunocytochemistry antibodies.**

| <b>Antibody</b> | <b>Company</b> | <b>Cat #:</b> |
|-----------------|----------------|---------------|
| AMHR            | Abcam          | Ab64762       |
| FSHR            | Santa Cruz     | Sc-7798       |
| Cyp19a1         | Abcam          | Ab35604       |
| Foxl2           | Abcam          | Ab5096        |
