# Supplementary material
Source: PubMed Central journal article supplement (PMC6344958)

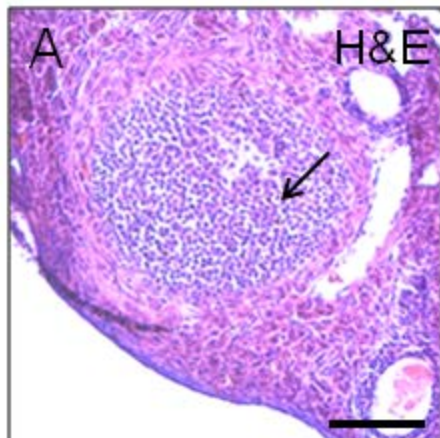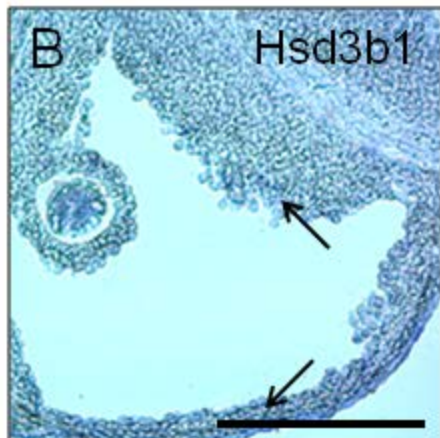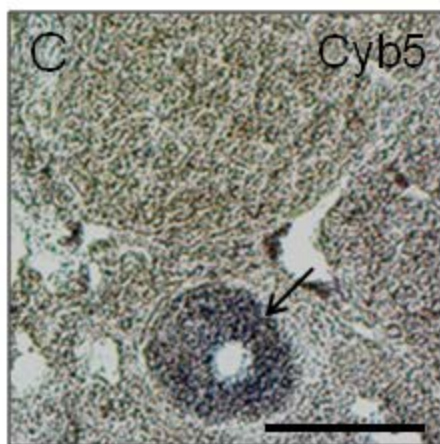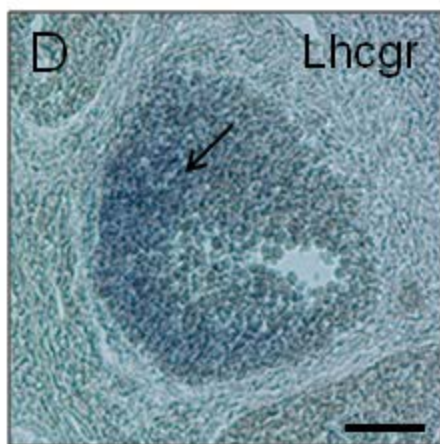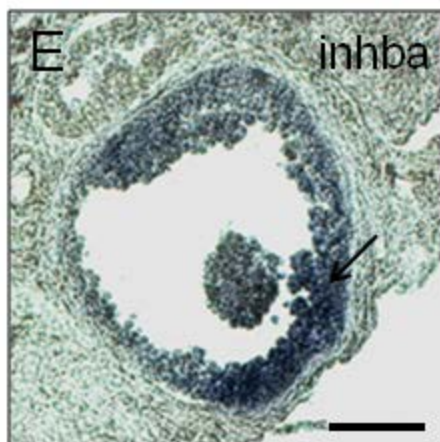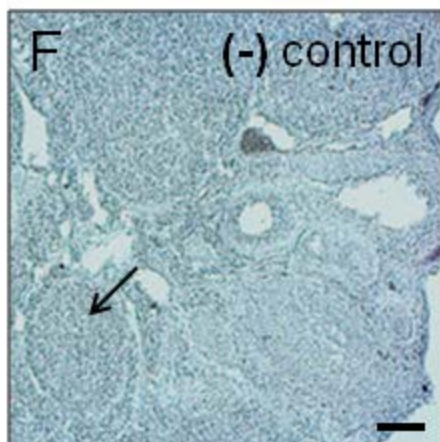

Supplement: Supplementary_materialFigure_S1.pdf [file Supplementary_materialFigure_S1.pdf]
